# Supplementary material
Source: PubMed Central journal article supplement (PMC5710196)

## Supplementary Online Content

Li B, Cui Y, Diehn M, Li R. Development and validation of an individualized immune prognostic signature in early-stage nonsquamous non-small cell lung cancer. *JAMA Oncol*. Published online July 6, 2017. doi:10.1001/jamaoncol.2017.1609

**eMethods.** Data Preprocessing, Assessment of Robustness, and Comparison With Commercialized Lung Biomarker

**eResults.** Analysis and Robustness of IRGPs

**eTable 1.** Details About the Data Sets Used in This Study

**eTable 2.** Clinical and Pathologic Features of Patients in Meta-training, Meta-testing, and Independent Validation Cohorts

**eTable 3.** Model Information About IRGPI

**eTable 4.** Univariate and Multivariate Analyses of Prognostic Factors in Meta-training, Meta-testing, and Independent Validation Data Sets

**eTable 5.** Biological Processes Overrepresented by Genes Consisting of IRGPI

**eTable 6.** RMS Time Ratio Between Low- and High-Risk Groups Based on IRGPI or ICPI in Different Data Sets

**eFigure 1.** Overview of the Construction and Validation of Immune and Composite Immune/Clinical Signatures

**eFigure 2.** Time-Dependent ROC Curve for IRGPI in the Meta-training Data Set at 5 Years

**eFigure 3.** Kaplan-Meier Curve of Overall Survival for Patients With Different IRGPI Risks

**eFigure 4.** Kaplan-Meier Curve of Overall Survival for Early- and Late-Stage Patients With Different IRGPI Risks

**eFigure 5.** Kaplan-Meier Curve of Overall Survival for Stage IA and IB Patients With Different IRGPI Risks

**eFigure 6.** C-index Comparison Between IRGPI and 2 Existing Biomarkers

**eFigure 7.** Time-Dependent ROC for ICPI and RMS Curve for ICPI and IRGPI in Meta-training Data Set

**eFigure 8.** Kaplan-Meier Curves for Overall Survival of All Patients Stratified by the IRGPI and the ICPI

**eFigure 9.** C-index Comparison Between ICPI and mPS Score in Validation Data Sets

This supplementary material has been provided by the authors to give readers additional information about their work.

## **eMethods. Data Preprocessing, Assessment of Robustness, and Comparison With Commercialized Lung Biomarker**

### **Data preprocessing**

All microarray data and corresponding clinical information were collected from Gene Expression Omnibus (<https://www.ncbi.nlm.nih.gov/geo/>). All affymetrix microarrays were normalized with MAS5.0 method (R package *affy*, v1.50.0). For Illumina datasets, Model-Based Background Correction (MBCB) processed data were downloaded. To improve reproducibility of data measured by different platforms, raw median intensity values of tumor samples in each Agilent datasets were extracted by R package *agilp* (v3.4.0).<sup>1</sup> Normalized TCGA RNA-Seq data and clinical information were downloaded from Cancer Genomics Browser (<https://genome-cancer.ucsc.edu/>).<sup>2</sup> Entrez IDs were used to represent genes across different platform. Probe sets correspond to multiple Entrez IDs were removed. If multiple probe sets correspond to the same Entrez ID, the one with the highest mean signal was selected as the expression level of the corresponding gene.<sup>3</sup> Gene symbols in TCGA dataset were also converted to Entrez IDs.

### **Assessing robustness of the 25 IRGPs and variability of prediction for different biomarkers**

To evaluate the robustness of the selected 25 IRGPs, feature selection and model building were repeated 1000 times in different randomization of the meta-cohort. The same criteria described in Methods were used to find prognostic IRGPs and build IRGP-based models in each meta-training cohort. IRGPs that appeared in at least one prognostic model were considered. The frequencies of selected IRGPs were used to estimate a background distribution. The frequencies of the 25 IRGPs consisting of the IRGPI were examined and compared with the background distribution with Wilcoxon rank-sum test. The C-index of IRGP-based prognostic biomarker, Cell Cycle Progression (CCP) score and the 14-gene biomarker was also calculated in 1000 randomization of the meta-testing cohort to estimate performance variations of each biomarker. Implementations of CCP score and 14-gene biomarker were described below. The standard deviation of C-index was used to measure the variability of survival prediction for different biomarkers.

### **Comparison with commercialized lung biomarker:**

The 14-gene biomarker consisting of 11 prognostic genes and 3 reference genes and the CCP biomarker consisting of 31 CCP genes were implemented.<sup>4,5</sup> Briefly, for 14-gene biomarker, gene expression values of 11 prognostic genes were normalized by those of 3 reference genes and risk scores for each patient were calculated based on coefficients proposed by the original paper.<sup>4</sup> The construction of CCP biomarker was based on the pipeline designed for microarray data.<sup>5</sup> In short, Affymetrix datasets were normalized with Robust Multi-array Average (RMA)<sup>6</sup> method. For Illumina and Agilent datasets, GEO normalized datasets were used. The average expression value of 31 genes were used as the CCP score.<sup>5</sup>

The performance of commercialized mPS<sup>7</sup>, which is an integration of CCP score with pathological staging was compared with our immune-clinical composite score ICPI in terms of C-index in the validation datasets.

## eResults. Analysis and Robustness of IRGPs

### Analysis of IRGPs with constant orderings

To further illustrate the possible causes of constant ordering, we categorized the total 126615 IRGPs with constant orderings into three groups based on measurement platforms and datasets. First, ~23% (29200) of IRGPs were consistently constant (all 0 or 1) in datasets only measured by a single platform (Affymetrix, Agilent or Illumina) and ~9% (11712) of IRGPs were consistently constant within one platform, but constant in the opposite direction in other platforms. These types of IRGPs, in our opinion, were caused by platform bias. Second, 58% (73805) IRGPs were consistently constant in datasets measured by at least two different platforms, which might be caused by biological preferential transcription. Third, the remaining 10% (11898) IRGPs were inconsistently constant (1 for some datasets and 0 for others) between different datasets of the same microarray platform. The reasons for this may be various, and one possibility could be batch effects.

### Robustness of 25 IRGPs in IRGPI

There were 1588 IRGPs that appeared in at least 1 model. Among the top 10 IRGPs with the highest frequencies, 5 of them were included in our 25 IRGPs. The smallest frequency of our 25 IRGPs ranked among top 25 percentile of that for all 1588 IRGPs. Wilcoxon rank-sum test showed significantly higher frequencies for our 25 IRGPs compared with the background distribution of frequencies for all 1588 IRGPs ( $P < 1.7 \times 10^{-14}$ ). Hence, our IRGPI biomarker was relatively robust to different randomization.

## eReferences

1. Stafford P, Brun M. Three methods for optimization of cross-laboratory and cross-platform microarray expression data. *Nucleic Acids Res.* 2007;35(10):e72.
2. Sanborn JZ, Benz SC, Craft B, et al. The UCSC Cancer Genomics Browser: update 2011. *Nucleic Acids Res.* 2011;39(Database issue):D951-959.
3. Miller JA, Cai C, Langfelder P, et al. Strategies for aggregating gene expression data: the collapseRows R function. *BMC Bioinformatics.* 2011;12:322.
4. Kratz JR, He J, Van Den Eeden SK, et al. A practical molecular assay to predict survival in resected non-squamous, non-small-cell lung cancer: development and international validation studies. *The Lancet.* 2012;379(9818):823-832.
5. Wistuba, II, Behrens C, Lombardi F, et al. Validation of a proliferation-based expression signature as prognostic marker in early stage lung adenocarcinoma. *Clin Cancer Res.* 2013;19(22):6261-6271.
6. Irizarry RA, Bolstad BM, Collin F, Cope LM, Hobbs B, Speed TP. Summaries of Affymetrix GeneChip probe level data. *Nucleic Acids Res.* 2003;31(4):e15.
7. Bueno R, Hughes E, Wagner S, et al. Validation of a molecular and pathological model for five-year mortality risk in patients with early stage lung adenocarcinoma. *Journal of thoracic oncology : official publication of the International Association for the Study of Lung Cancer.* 2015;10(1):67-73.

**eTable 1. Details About the Data Sets Used in This Study**

|                                 | <b>Name/Accession No.</b>                   | <b>Platform</b>                                           | <b>No. of Nonsquamous NSCLC</b> |
|---------------------------------|---------------------------------------------|-----------------------------------------------------------|---------------------------------|
| Independent validation datasets | TCGA lung adenocarcinoma (TCGA)             | Illumina HiSeq                                            | 439                             |
|                                 | Director's Challenge Consortium (DCC)       | Affymetrix Human Genome U133A Array                       | 323                             |
|                                 | GSE30219                                    | Affymetrix Human Genome U133 Plus 2.0 Array               | 207                             |
| Meta (training/testing) dataset | GSE31210                                    | Affymetrix Human Genome U133 Plus 2.0 Array               | 204                             |
|                                 | GSE41271                                    | Illumina HumanWG-6 v3.0 expression beadchip               | 192                             |
|                                 | GSE50081                                    | Affymetrix Human Genome U133 Plus 2.0 Array               | 138                             |
|                                 | GSE13213                                    | Agilent-014850 Whole Human Genome Microarray 4x44K G4112F | 117                             |
|                                 | GSE26939                                    | Agilent-UNC-custom-4X44K                                  | 115                             |
|                                 | GSE83227                                    | Affymetrix Human Genome U95 Version 2 Array               | 112                             |
|                                 | GSE11969                                    | Agilent Homo sapiens 21.6K custom array                   | 105                             |
|                                 | GSE42127                                    | Illumina HumanWG-6 v3.0 expression beadchip               | 94                              |
|                                 | GSE68571                                    | Affymetrix Human Full Length HuGeneFL Array               | 86                              |
|                                 | GSE19188                                    | Affymetrix Human Genome U133 Plus 2.0 Array               | 58                              |
|                                 | GSE3141                                     | Affymetrix Human Genome U133 Plus 2.0 Array               | 58                              |
|                                 | GSE37745                                    | Affymetrix Human Genome U133 Plus 2.0 Array               | 47                              |
|                                 | GSE10245                                    | Affymetrix Human Genome U133 Plus 2.0 Array               | 40                              |
|                                 | GSE14814                                    | Affymetrix Human Genome U133A Array                       | 36                              |
| GSE31547                        | Affymetrix Human Genome U133A Array         | 30                                                        |                                 |
| GSE31546                        | Affymetrix Human Genome U133 Plus 2.0 Array | 13                                                        |                                 |

**eTable 2. Clinical and Pathologic Features of Patients in Meta-training, Meta-testing, and Independent Validation Cohorts**

|                                     | Meta-training | Meta-testing | <i>P</i><br>Value* | DCC          | GSE30219     | TCGA         |
|-------------------------------------|---------------|--------------|--------------------|--------------|--------------|--------------|
| <b>No. of samples</b>               | 729           | 716          |                    | 323          | 207          | 439          |
| <b>Median age in years (range)</b>  | 63 (35 – 86)  | 64 (30 - 90) | .32                | 66 (33 - 87) | 61 (15 - 84) | 67 (38 - 88) |
| <b>Female (%)</b>                   | 364 (50)      | 321 (45)     | .11                | 158 (49)     | 37 (18)      | 231 (53)     |
| <b>Male (%)</b>                     | 322 (44)      | 340 (47)     |                    | 165 (51)     | 170 (82)     | 208 (47)     |
| <b>Stage IA (%)</b>                 | 125 (17)      | 118 (16)     |                    | 108 (33)     | 98 (47)      | 123 (28)     |
| <b>Stage IB (%)</b>                 | 155 (21)      | 157 (22)     |                    | 116 (36)     | 32 (15)      | 116 (26)     |
| <b>Stage IA/B (%)<sup>a</sup></b>   | 128 (18)      | 109 (15)     |                    | 0            | 0            | 6 (1)        |
| <b>Stage IIA (%)</b>                | 22 (3)        | 18 (3)       |                    | 17 (5)       | 9 (4)        | 44 (10)      |
| <b>Stage IIB (%)</b>                | 65 (9)        | 55 (8)       | .59                | 41 (13)      | 22 (11)      | 55 (13)      |
| <b>Stage IIA/B (%)<sup>b</sup></b>  | 22 (3)        | 28 (4)       |                    | 0            | 0            | 1 (0)        |
| <b>Stage IIIA (%)</b>               | 42 (6)        | 63 (9)       |                    | 33 (10)      | 22 (11)      | 62 (14)      |
| <b>Stage IIIB (%)</b>               | 25 (3)        | 17 (2)       |                    | 7 (2)        | 16 (8)       | 10 (2)       |
| <b>Stage IIIA/B (%)<sup>c</sup></b> | 10 (1)        | 9 (1)        |                    | 0            | 0            | 0            |
| <b>Stage IV (%)</b>                 | 8 (1)         | 6 (1)        |                    | 0            | 3 (1)        | 21 (5)       |
| <b>Positive smoking history (%)</b> | 397 (54)      | 393 (55)     | 1.00               | 206 (64)     | NA           | 371 (85)     |
| <b>Non-smoker (%)</b>               | 151 (21)      | 148 (21)     |                    | 32 (10)      | NA           | 61 (14)      |
| <b>Median Follow-up in months</b>   | 47.6          | 43.85        |                    | 48           | 55           | 14.47        |
| <b>No. of death (%)</b>             | 291 (40)      | 303 (42)     | .29                | 155 (48)     | 134 (65)     | 118 (27)     |

Abbreviations: DCC, Director's Challenge Consortium; TCGA, TCGA lung adenocarcinoma dataset;

<sup>a</sup> annotated as stage I patients only

<sup>b</sup> annotated as stage II patients only

<sup>c</sup> annotated as stage III patients only

NA represents information was unavailable

\* The difference between meta-testing and meta-training dataset was calculated in terms of clinical pathologic factors. Specifically, age was compared with Wilcoxon rank-sum test; gender, stage and smoking history was compared with chi-squared test; follow-up difference was assessed with log-rank test.

**eTable 3. Model Information About IRGPI**

| <b>IRG 1</b>  | <b>Full name</b>                                                                   | <b>Immune processes</b>             | <b>IRG 2</b>  | <b>Full name</b>                                                       | <b>Immune processes</b>             | <b>Coefficient</b> |
|---------------|------------------------------------------------------------------------------------|-------------------------------------|---------------|------------------------------------------------------------------------|-------------------------------------|--------------------|
| <i>ESM1</i>   | endothelial cell-specific molecule 1                                               | Cytokine                            | <i>AGTR1</i>  | angiotensin II receptor, type 1                                        | Cytokine receptor                   | -0.151291958       |
| <i>CX3CR1</i> | chemokine (C-X3-C motif) receptor 1                                                | Cytokine receptor                   | <i>FCGR2B</i> | Fc fragment of IgG, low affinity IIb, receptor (CD32)                  | BCR signaling                       | 0.10001878         |
| <i>ADRB2</i>  | adrenergic, beta-2-, receptor, surface                                             | Cytokine receptor                   | <i>HTR3A</i>  | 5-hydroxytryptamine (serotonin) receptor 3A                            | Cytokine receptor                   | 0.014243079        |
| <i>ADRB2</i>  | adrenergic, beta-2-, receptor, surface                                             | Cytokine receptor                   | <i>INHBB</i>  | inhibin, beta B                                                        | Cytokine                            | 0.074206935        |
| <i>EDN3</i>   | endothelin 3                                                                       | Cytokine                            | <i>CD1B</i>   | CD1b molecule                                                          | Antigen processing and presentation | -0.035977941       |
| <i>EDNRB</i>  | endothelin receptor type B                                                         | Cytokine receptor                   | <i>INHBB</i>  | inhibin, beta B                                                        | Cytokine                            | 0.06319796         |
| <i>ANGPT1</i> | angiopoietin 1                                                                     | Cytokine receptor                   | <i>IL1B</i>   | interleukin 1, beta                                                    | Cytokine                            | 0.028027231        |
| <i>GZMB</i>   | granzyme B                                                                         | Natural Killer cell cytotoxicity    | <i>IL6R</i>   | interleukin 6 receptor                                                 | Cytokine receptor                   | -0.047644839       |
| <i>HSPA6</i>  | heat shock 70kDa protein 6 (HSP70B')                                               | Antigen processing and presentation | <i>CD1C</i>   | CD1c molecule                                                          | Antigen processing and presentation | -0.025903083       |
| <i>IL7</i>    | interleukin 7                                                                      | Cytokine                            | <i>MIA</i>    | melanoma inhibitory activity                                           | Cytokine                            | 0.028908034        |
| <i>INHBB</i>  | inhibin, beta B                                                                    | Cytokine                            | <i>CX3CL1</i> | chemokine (C-X3-C motif) ligand 1                                      | Cytokine                            | -0.00418581        |
| <i>NR3C2</i>  | nuclear receptor subfamily 3, group C, member 2                                    | Cytokine receptor                   | <i>PIK3CA</i> | phosphoinositide-3-kinase, catalytic, alpha polypeptide                | Multiple                            | 0.030567093        |
| <i>NFKBIB</i> | nuclear factor of kappa light polypeptide gene enhancer in B-cells inhibitor, beta | Multiple                            | <i>PTGER2</i> | prostaglandin E receptor 2 (subtype EP2), 53kDa                        | Cytokine receptor                   | -0.013838628       |
| <i>NRAS</i>   | neuroblastoma RAS viral (v-ras) oncogene homolog                                   | Multiple                            | <i>BMPR2</i>  | bone morphogenetic protein receptor, type II (serine/threonine kinase) | Cytokine receptor                   | -0.104349443       |
| <i>PSMD2</i>  | proteasome (prosome, macropain) 26S subunit, non-ATPase, 2                         | Antigen processing and presentation | <i>TGFBR2</i> | transforming growth factor, beta receptor II (70/80kDa)                | Cytokine receptor                   | -0.006260886       |
| <i>RORA</i>   | RAR-related orphan receptor A                                                      | Cytokine receptor                   | <i>TGFA</i>   | transforming growth factor, alpha                                      | Cytokine                            | 0.063627166        |
| <i>RORA</i>   | RAR-related orphan receptor A                                                      | Cytokine receptor                   | <i>RABEP1</i> | rabaptin, RAB GTPase binding effector protein 1                        | Cytokine                            | 0.035503811        |
| <i>CCL7</i>   | chemokine (C-C motif) ligand 7                                                     | Cytokine                            | <i>CCL17</i>  | chemokine (C-C motif) ligand 17                                        | Cytokine                            | -0.068004041       |
| <i>CCL13</i>  | chemokine (C-C motif) ligand 13                                                    | Cytokine                            | <i>IL32</i>   | interleukin 32                                                         | Cytokine                            | 0.066796769        |
| <i>SECTM1</i> | secreted and transmembrane 1                                                       | Cytokine                            | <i>VAV1</i>   | vav 1 guanine nucleotide exchange factor                               | Multiple                            | -0.052319774       |
| <i>BTK</i>    | Bruton agammaglobulinemia                                                          | BCR signaling                       | <i>IL1R2</i>  | interleukin 1 receptor, type II                                        | Cytokine receptor                   | 0.097609448        |

|              |                                 |                   |              |                                                  |                                     |              |
|--------------|---------------------------------|-------------------|--------------|--------------------------------------------------|-------------------------------------|--------------|
|              | tyrosine kinase                 |                   |              |                                                  |                                     |              |
| <i>C5</i>    | complement component 5          | Cytokine          | <i>ZAP70</i> | zeta-chain (TCR) associated protein kinase 70kDa | Multiple                            | 0.046488127  |
| <i>C5</i>    | complement component 5          | Cytokine          | <i>MIA</i>   | melanoma inhibitory activity                     | Cytokine                            | 0.039305453  |
| <i>IL1R2</i> | interleukin 1 receptor, type II | Cytokine receptor | <i>CD1C</i>  | CD1c molecule                                    | Antigen processing and presentation | -0.092033309 |
| <i>MIA</i>   | melanoma inhibitory activity    | Cytokine          | <i>CD1B</i>  | CD1b molecule                                    | Antigen processing and presentation | -0.185391168 |

**eTable 4. Univariate and Multivariate Analyses of Prognostic Factors in Meta-training, Meta-testing, and Independent Validation Data Sets**

| Datasets      | Variable    | Univariate         |                        | Multivariate        |                        |
|---------------|-------------|--------------------|------------------------|---------------------|------------------------|
|               |             | HR (95% CI)        | P Value <sup>a</sup>   | HR (95% CI)         | P Value <sup>b</sup>   |
| Meta-training | Age         | 1.04 (1.02 – 1.05) | 2.68×10 <sup>-7</sup>  | 1.03 (1.00 – 1.06)  | .055                   |
|               | Gender      | 1.59 (1.24 - 2.02) | .00017                 | 1.33 (0.72 - 2.44)  | .37                    |
|               | Smoking     | 2.08 (1.46 - 2.96) | 3.27×10 <sup>-5</sup>  | 1.09 (0.47 - 2.55)  | .84                    |
|               | Stage       | 1.39 (1.29 – 1.50) | <2×10 <sup>-16</sup>   | 1.24 (1.05 - 1.47)  | .010                   |
|               | Grade       | 2.55 (1.73 - 3.76) | 9.45×10 <sup>-7</sup>  | 1.82 (1.12 - 2.95)  | .016                   |
|               | Immune risk | 4.38 (3.37 - 5.70) | <2×10 <sup>-16</sup>   | 4.86 (2.28 - 10.34) | 4.10×10 <sup>-5</sup>  |
| Meta-testing  | Age         | 1.02 (1.01 – 1.03) | .0044                  | 1.02 (1.00 – 1.03)  | .022                   |
|               | Gender      | 1.38 (1.09 – 1.75) | .0075                  | 1.14 (0.82 - 1.58)  | .44                    |
|               | Smoking     | 1.57 (1.14 - 2.17) | .0050                  | 1.19 (0.81 - 1.77)  | .38                    |
|               | Stage       | 1.45 (1.35 – 1.57) | <2×10 <sup>-16</sup>   | 1.46 (1.34 - 1.58)  | < 2×10 <sup>-16</sup>  |
|               | Grade       | 1.34 (0.99 – 1.81) | .056                   | -                   | -                      |
|               | Immune risk | 2.21 (1.75 – 2.79) | 7.47×10 <sup>-12</sup> | 1.72 (1.26 - 2.33)  | .00054                 |
| DCC           | Age         | 1.03 (1.01 – 1.05) | .00054                 | 1.04 (1.02 – 1.05)  | .00011                 |
|               | Gender      | 1.41 (1.02 – 1.95) | .035                   | 1.07 (0.77 - 1.49)  | .68                    |
|               | Smoking     | 1.31 (0.70 – 2.45) | .39                    | -                   | -                      |
|               | Stage       | 1.54 (1.39 - 1.70) | <2×10 <sup>-16</sup>   | 1.52 (1.37 - 1.69)  | 5.66×10 <sup>-15</sup> |
|               | Grade       | 1.03 (0.81 - 1.31) | .81                    | -                   | -                      |
|               | Immune risk | 2.00 (1.41 - 2.84) | 8.54×10 <sup>-5</sup>  | 1.75 (1.22 - 2.50)  | .0023                  |
| GSE30219      | Age         | 1.04 (1.02 – 1.06) | 6.48×10 <sup>-6</sup>  | 1.03 (1.01 – 1.05)  | .00050                 |
|               | Gender      | 2.00 (1.19 - 3.37) | .0081                  | 1.49 (0.88 – 2.54)  | .14                    |
|               | Smoking     | NA                 | NA                     | -                   | -                      |
|               | Stage       | 1.28 (1.17 - 1.40) | 1.59×10 <sup>-8</sup>  | 1.19 (1.08 - 1.31)  | .00048                 |
|               | Grade       | NA                 | NA                     | -                   | -                      |
|               | Immune risk | 3.72 (2.43 - 5.70) | 1.10×10 <sup>-10</sup> | 2.36 (1.47 – 3.79)  | .00038                 |
| TCGA          | Age         | 1.02 (1.00 – 1.04) | .073                   | -                   | -                      |
|               | Gender      | 1.13 (0.79 - 1.62) | .51                    | -                   | -                      |
|               | Smoking     | 0.85 (0.49 - 1.46) | .54                    | -                   | -                      |
|               | Stage       | 1.32 (1.20 - 1.45) | 1.90×10 <sup>-9</sup>  | 1.30 (1.18 - 1.43)  | 1.40×10 <sup>-7</sup>  |
|               | Grade       | NA                 | NA                     | -                   | -                      |
|               | Immune risk | 2.15 (1.46 - 3.16) | 7.28×10 <sup>-5</sup>  | 1.85 (1.26 - 2.73)  | .0019                  |

Abbreviations: DCC, Director's Challenge Consortium; TCGA, TCGA adenocarcinoma dataset;

a P value was calculated by log-rank test

b P value was calculated with wald-test of Cox-proportional hazard regression model

- represents variables were not included in multivariate Cox regression

NA represents variables were not publicly available

Age, stage, grade was coded as continuous variable. Specifically, stage was coded as IA=1, IA/IB=1.5, IB=2, IIA=3, IIA/B=3.5, IIB=4 etc.

Grade was coded as well differentiated=0, moderate differentiated=1, poorly differentiated=2. The risk factors of gender, smoking and immune risk are male, smoker and high risk based on IRGPI.



**eTable 5. Biological Processes Overrepresented by Genes Consisting of IRGPI**

| <b>GO ID</b> | <b>BP name</b>                                                                       | <b><i>P</i><br/>Value</b> |
|--------------|--------------------------------------------------------------------------------------|---------------------------|
| GO:0030593   | neutrophil chemotaxis                                                                | .018                      |
| GO:2001240   | negative regulation of extrinsic apoptotic signaling pathway<br>in absence of ligand | .042                      |
| GO:0010468   | regulation of gene expression                                                        | .053                      |
| GO:0002548   | monocyte chemotaxis                                                                  | .063                      |
| GO:0048246   | macrophage chemotaxis                                                                | .090                      |
| GO:0071347   | cellular response to interleukin-1                                                   | .095                      |

**eTable 6. RMS Time Ratio Between Low- and High-Risk Groups Based on IRGPI or ICPI in Different Data Sets**

| RMS time (months) | IRGPI                     |                          |                       | ICPI                       |                          |                       |
|-------------------|---------------------------|--------------------------|-----------------------|----------------------------|--------------------------|-----------------------|
|                   | low risk (95% CI)         | high risk (95% CI)       | ratio (95% CI)        | low risk (95% CI)          | high risk (95% CI)       | ratio (95% CI)        |
| Meta-training     | 99.40<br>(95.05 - 103.75) | 59.88<br>(53.89 - 65.87) | 1.66<br>(1.49 - 1.85) | 101.51<br>(97.31 - 105.72) | 58.47<br>(52.62 - 64.32) | 1.74<br>(1.56 - 1.94) |
| Meta-testing      | 88.88<br>(83.78 - 93.98)  | 63.37<br>(57.14 - 69.60) | 1.40<br>(1.25 - 1.57) | 95.76<br>(90.88 - 100.64)  | 57.68<br>(51.89 - 63.47) | 1.66<br>(1.48 - 1.86) |
| DCC               | 84.87<br>(76.73 - 93.00)  | 64.75<br>(57.83 - 71.68) | 1.31<br>(1.14 - 1.51) | 91.00<br>(83.62 - 98.38)   | 59.03<br>(52.10 - 65.96) | 1.54<br>(1.34 - 1.78) |
| GSE30219          | 96.32<br>(87.12 - 105.52) | 52.44<br>(44.49 - 60.39) | 1.84<br>(1.54 - 2.20) | 91.71<br>(82.74 - 100.69)  | 48.93<br>(40.70 - 57.15) | 1.88<br>(1.54 - 2.28) |
| TCGA              | 74.77<br>(63.47 - 86.08)  | 50.60<br>(41.51 - 59.68) | 1.48<br>(1.17 - 1.87) | 83.90<br>(72.03 - 95.77)   | 47.65<br>(39.67 - 55.63) | 1.76<br>(1.41 - 2.19) |

## eFigure 1. Overview of the Construction and Validation of Immune and Composite Immune/Clinical Signatures

Nineteen datasets were included in this study. The three largest individual datasets were used for independent validation, while the remaining 16 datasets were merged to a meta-dataset. The meta-dataset was randomly divided into meta-training and meta-testing datasets. The meta-training dataset was used to build an immune prognostic signature (IRGPI). Age, stage and IRGPI were used to construct the composite immune clinical prognostic signature (ICPI). Both IRGPI and ICPI were evaluated on the meta-testing, Director's Challenge Consortium (DCC), GSE30219 and TCGA lung adenocarcinoma (TCGA) datasets.

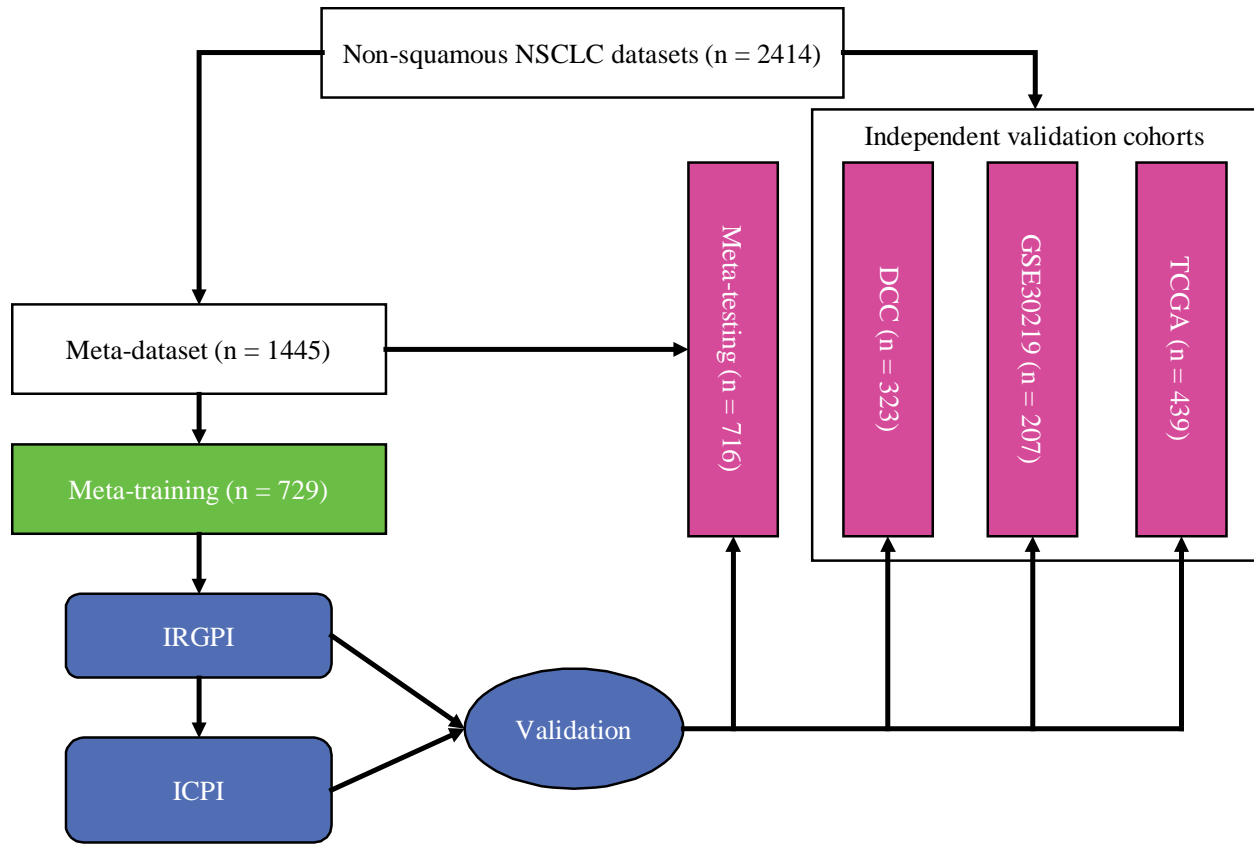

### eFigure 2. Time-Dependent ROC Curve for IRGPI in the Meta-training Data Set at 5 Years

Green line indicates the shortest distance between the receiver operating characteristic (ROC) curve and the point represents 100 percent true positive rate and 0 percent false positive rate. Intersection of green line with ROC curve corresponds to the IRGPI score of 0.988 which was used as cutoff for IRGPI to stratify patients into low or high immune risk group.

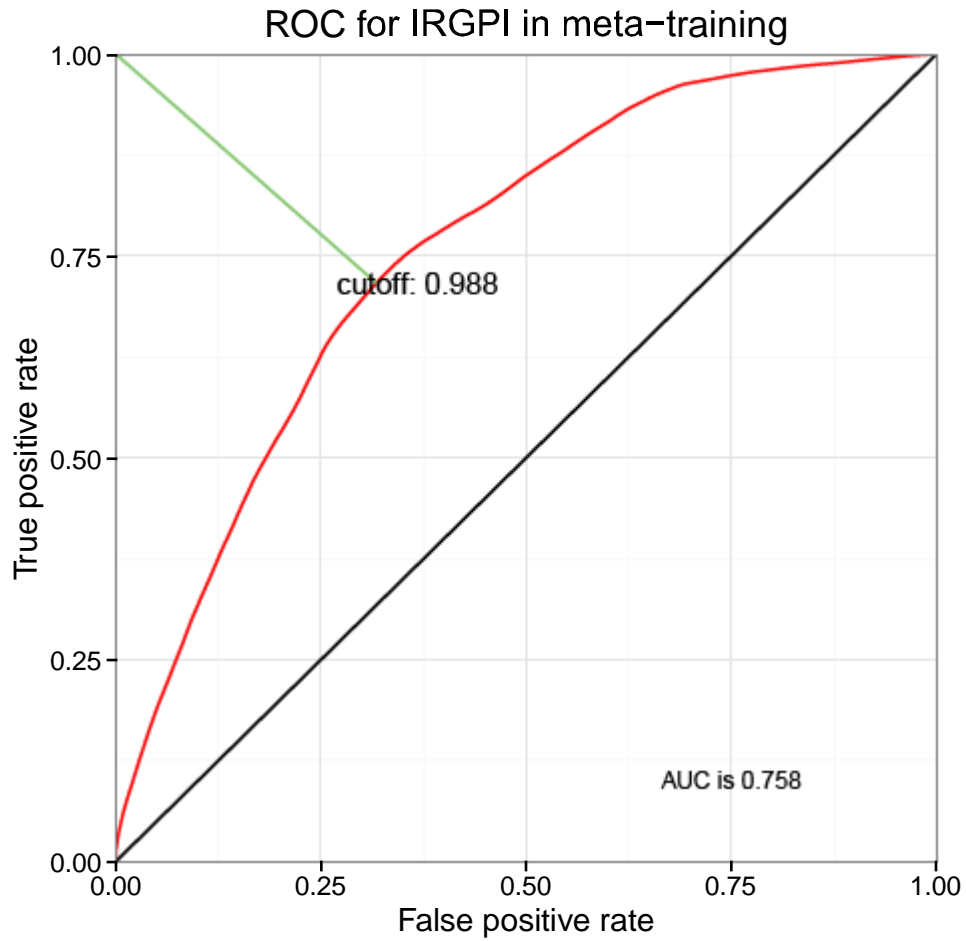

### eFigure 3. Kaplan-Meier Curve of Overall Survival for Patients With Different IRGPI Risks

All patients in meta-training (A), meta-testing (B) and 3 independent validation datasets (C-E) were stratified into low or high immune risk groups based on IRGPI score.

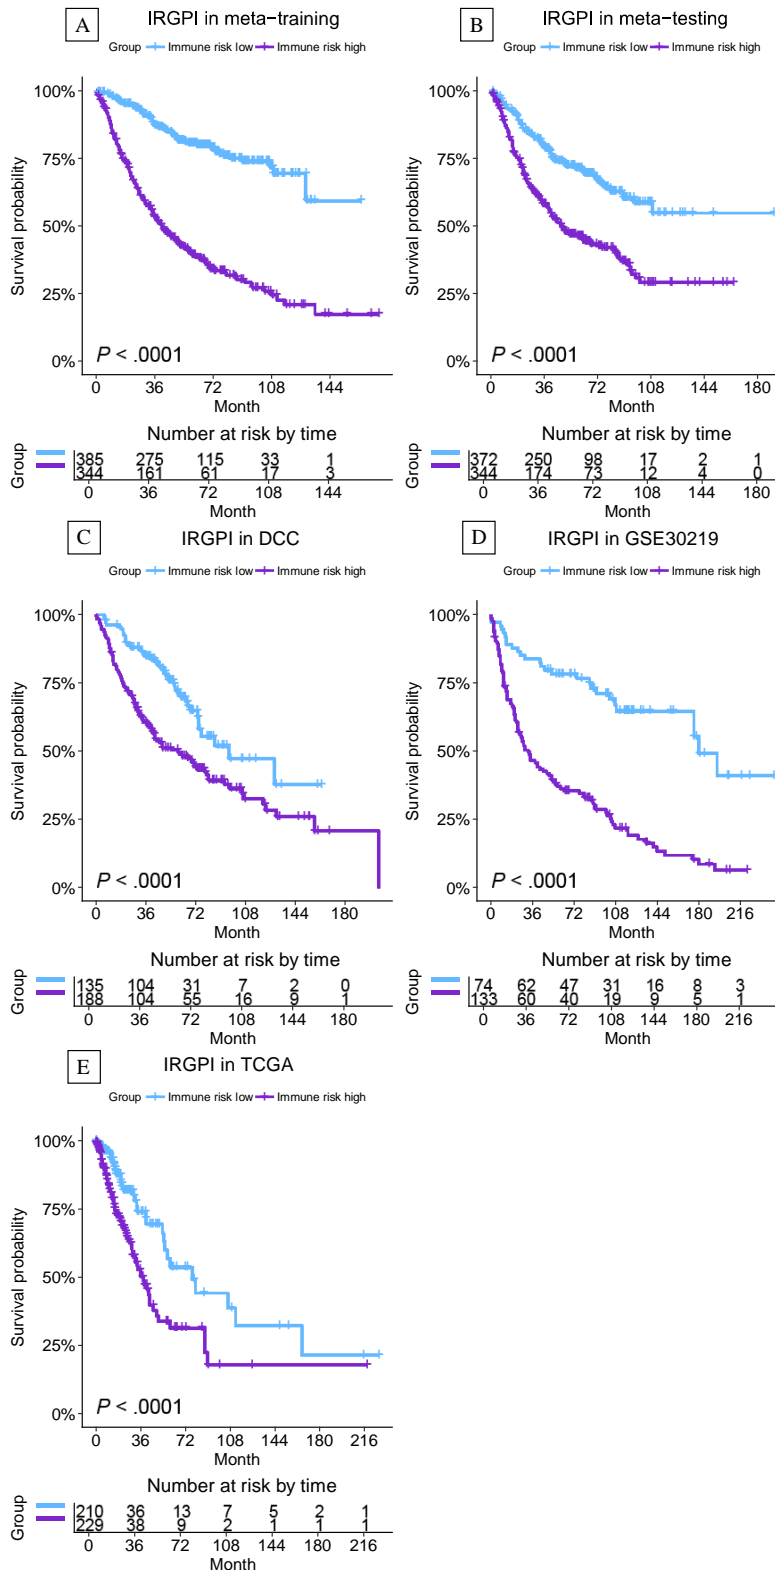

## eFigure 4. Kaplan-Meier Curve of Overall Survival for Early- and Late-Stage Patients With Different IRGPI Risks

Early stage (stage I or II) patients in meta-training (A), meta-testing (B) and 3 independent validation datasets (C-E) were stratified into low or high immune risk groups based on IRGPI score. (F) Late stage (stage III or IV) patients of meta-testing, DCC, GSE30219 and TCGA were stratified into low or high immune risk groups based on IRGPI score.

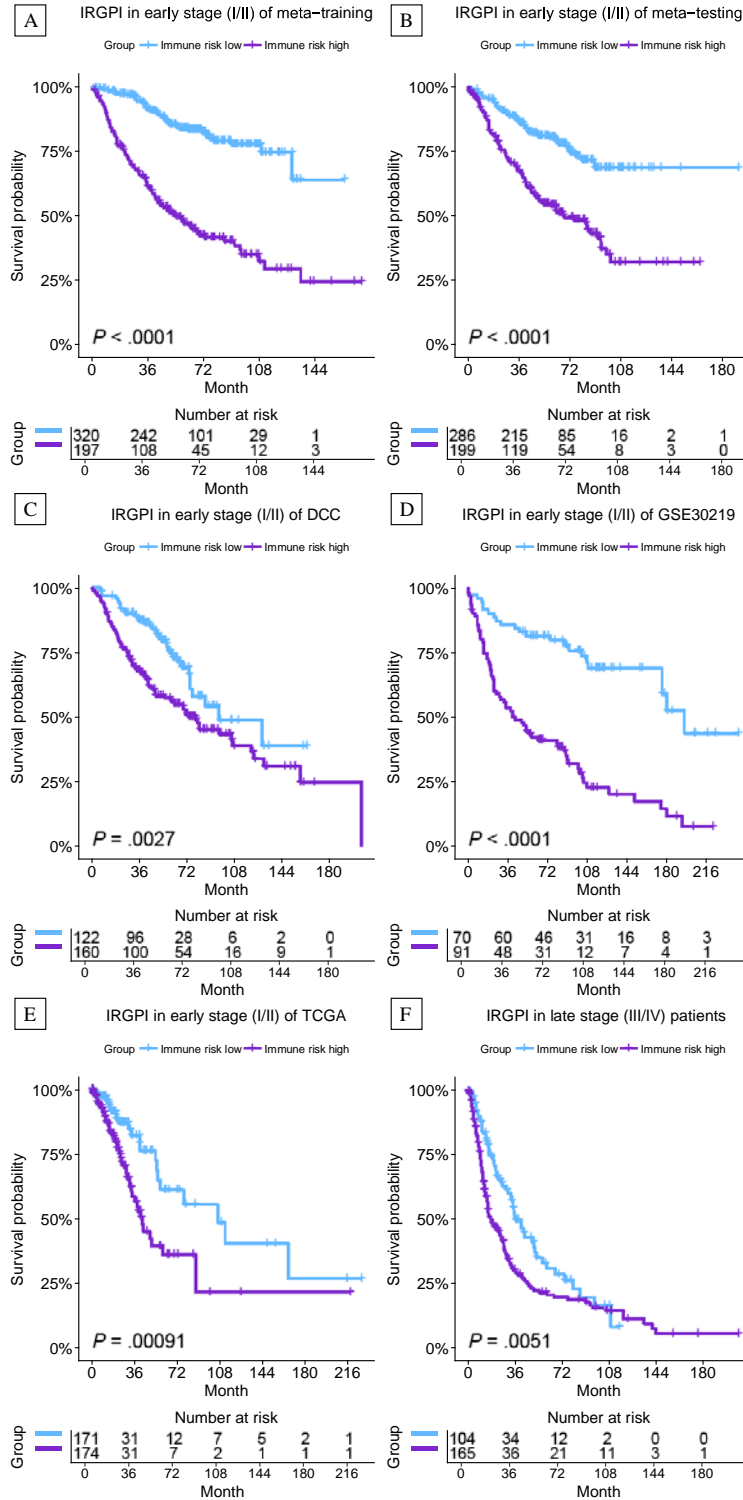

## eFigure 5. Kaplan-Meier Curve of Overall Survival for Stage IA and IB Patients With Different IRGPI Risks

A: survival curve of stage IA patients of meta-testing dataset; B: survival curve of all stage IA patients in 3 independent validation datasets; C: survival curve of stage IB patients of meta-testing dataset; D: survival curve of all stage IB patients in 3 independent validation datasets.

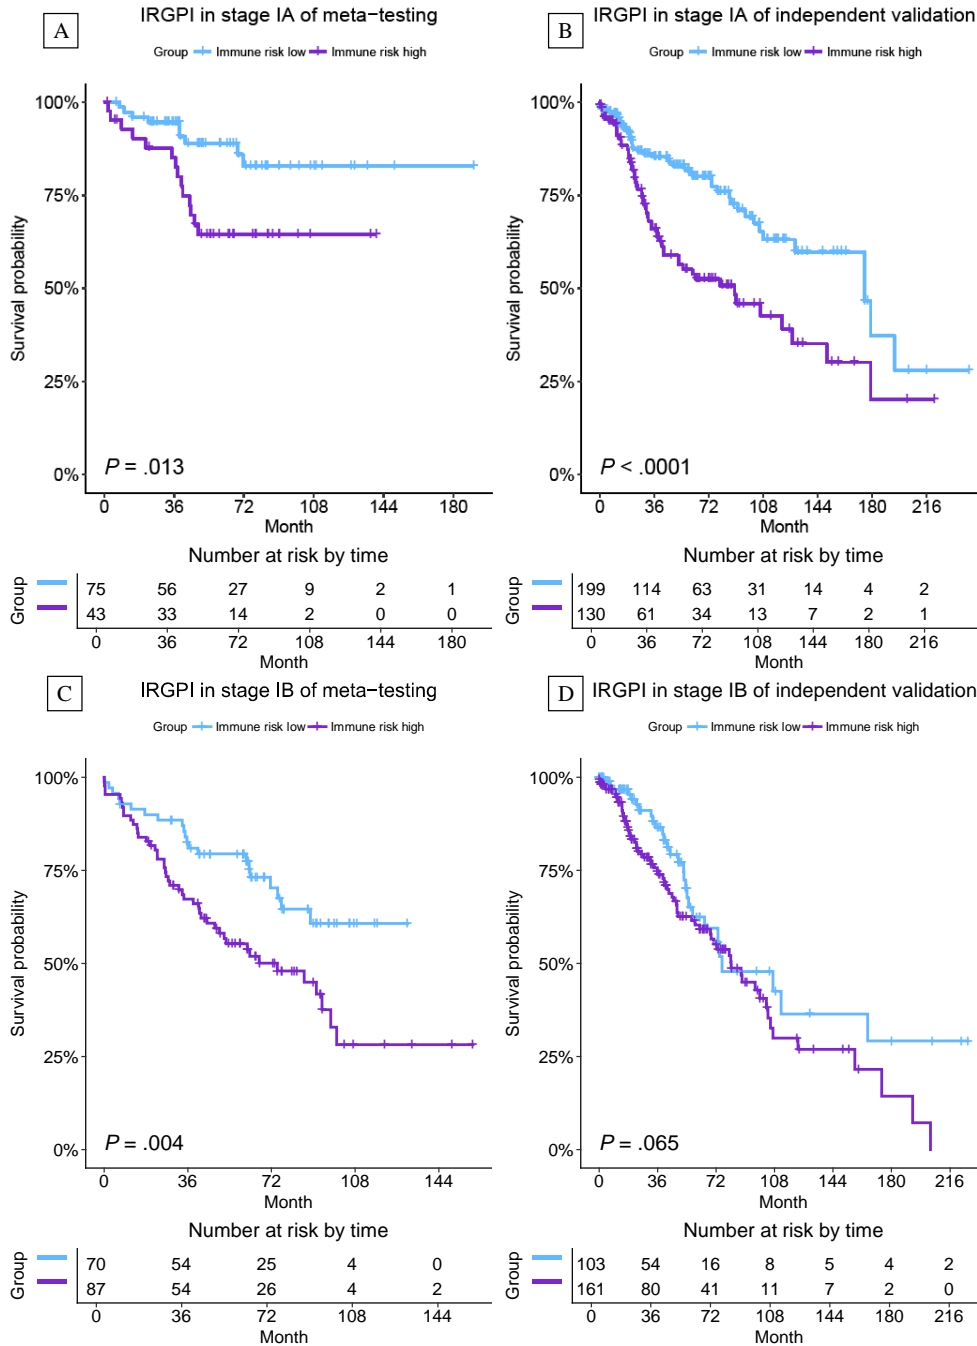

### eFigure 6. C-index Comparison Between IRGPI and 2 Existing Biomarkers

A: comparison of C-index between 14-gene biomarker and IRGPI in stage I to III patients in GSE13213 and TCGA dataset. B: comparison of C-index between CCP score and IRGPI in early stage patients in meta-testing, DCC, GSE30219 and TCGA datasets. Whisker represents confident interval of estimated corresponding C-index. Dashed horizontal line indicates random prediction (C-index = 0.5).

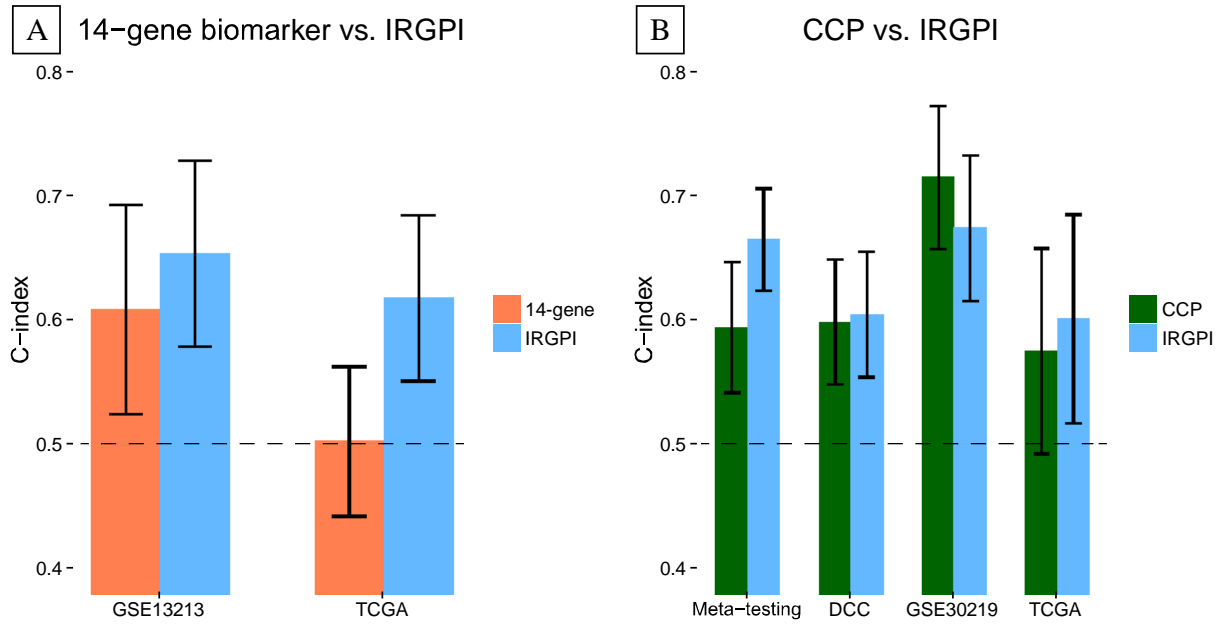



## eFigure 7. Time-Dependent ROC for ICPI and RMS Curve for ICPI and IRGPI in Meta-training Data Set

(A) Green line indicates the shortest distance between the receiver operating characteristic (ROC) curve and the point represents 100 percent true positive rate and 0 percent false positive rate. Intersection of green line with ROC curve corresponds to the ICPI score of 0.116 which was used as cutoff for ICPI to stratify patients into low or high risk groups. (B) RMS (restricted mean survival) curve of continuous ICPI and IRGPI

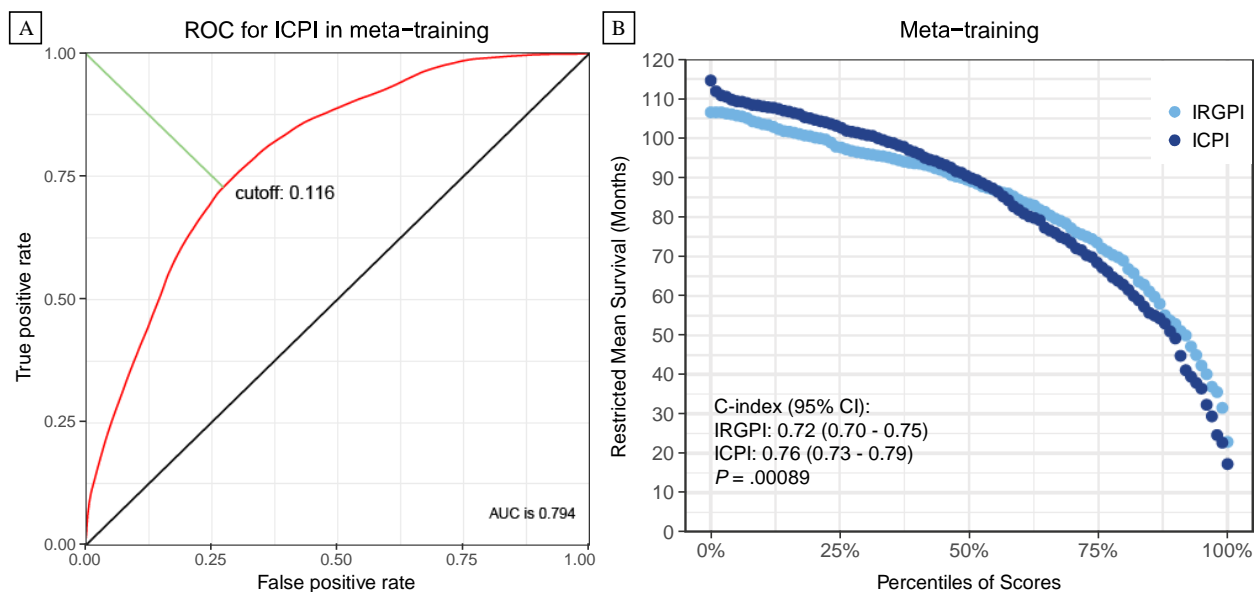

### eFigure 8. Kaplan-Meier Curves for Overall Survival of All Patients Stratified by the IRGPI and the ICPI

Patients were stratified with both IRGPI and ICPI in all patients of meta-testing (A) and all patients of 3 independent validation datasets (B). The composite index had higher separation than immune index alone between high versus low risk groups in both cases.

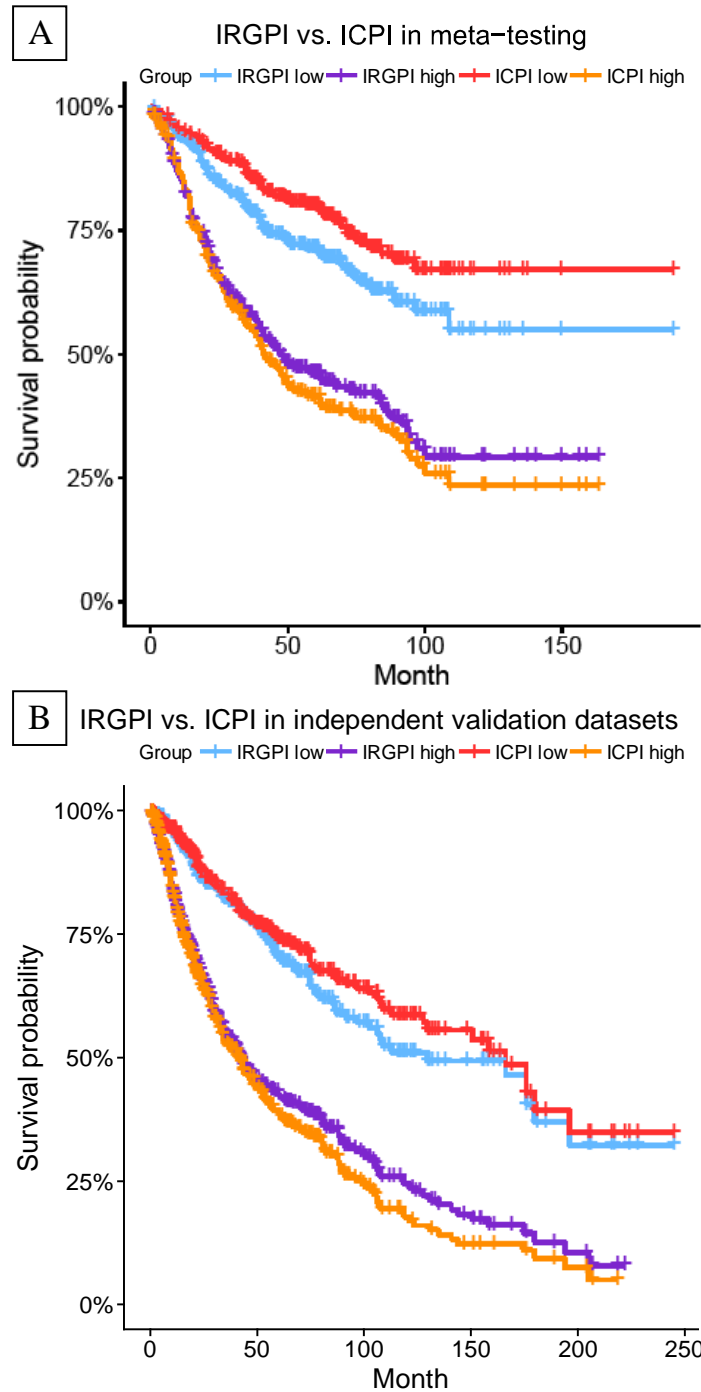

### eFigure 9. C-index Comparison Between ICPI and mPS Score in Validation Data Sets

Comparison of C-index between ICPI and mPS score in early stage patients in meta-testing, DCC, GSE30219 and TCGA datasets. Dashed horizontal line indicates random prediction (C-index = 0.5).

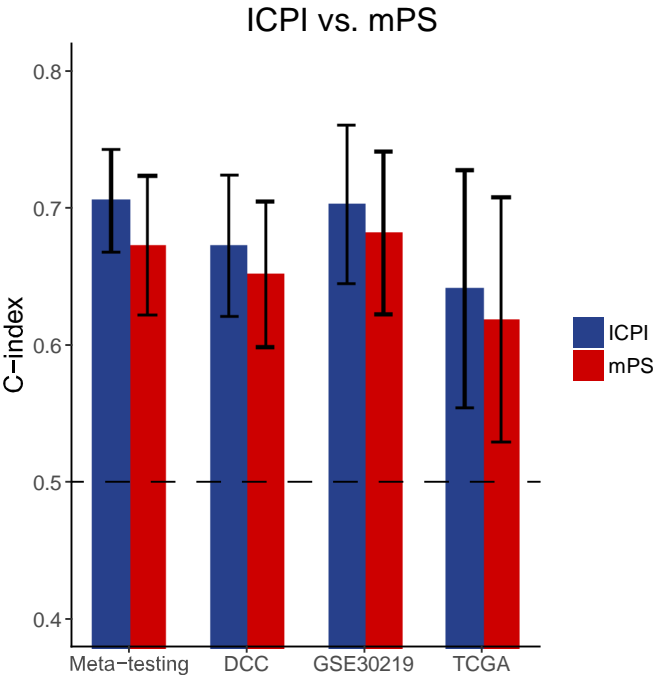

Supplement: jamaoncol-3-1529-s001.pdf [file jamaoncol-3-1529-s001.pdf]
